# Supplementary material for: Mutations in POLR3A and POLR3B are a major cause of hypomyelinating leukodystrophies with or without dental abnormalities and/or hypogonadotropic hypogonadism
Source: HighWire-hosted journal article supplement (doi:10.1136/jmedgenet-2012-101357), 2013-01-25
Supplement: jmedgenet-2012-101357supp_table2.xls [file jmedgenet-2012-101357supp_table2.xls]

## Sheet: Sheet4
	Supplementary Table 2: Genotypes of SNPs in patients with the p.V523E mutation in POLR3B.
		rs ID
	Cases	rs7134881	rs7135054	rs138249161	rs34234806	rs17038460	rs13561
		Intron 4	Intron 5	Exon 15 (p.V523E)	Intron 19	Exon 20	Exon 28
		106763013	106763268	106826199	106838456	106848414	106903321
	P8	C	A	A	T	G	T
		C	A	T	T	A	C
	P9	C	A	A	T	G	T
		C	A	T	T	A	T
	P10	C	A	A	T	G	T
		C	A	T	T	A	C
	P11	C	A	A	T	G	T
		C	A	T	T	A	T
	P12	C	A	A	T	G	T
		C	A	T	T	A	C
	P14	C	A	A	T	G	T
		C	A	T	T	A	C
	Tétreault et al, 2011	C	A	A	T	G	T
		C	A	T	C	A	T
		C	A	A	T	G	T
		T	G	T	T	A	T
		C	A	A	T	G	T
		T	G	T	C	A	T
		Shared haplotype
